# Supplementary material for: MicroRNA-192 inhibits cell proliferation and induces apoptosis in human breast cancer by targeting caveolin 1
Source: PubMed Central journal article supplement — Oncol Rep. 2019 Aug 30;42(5):1667–76. doi: 10.3892/or.2019.7298 (PMC6775803; doi:10.3892/or.2019.7298), 2019-08-30
Supplement: Supplementary_Data.pdf [file Supplementary_Data.pdf]

Figure S1. (A) Reverse transcription-quantitative polymerase chain reaction was performed to analyze the expression levels of miR-192 in breast cancer cell lines, including Hs578T, BCap37 and SK-BR-3, and in the normal cell line Hs578Bst. (B) Correlation between the expression levels of miR-192 and CAV1 was analyzed. \*\*\*P<0.001 vs. Hs578Bst. CAV1, caveolin 1; miR-192, microRNA-192.

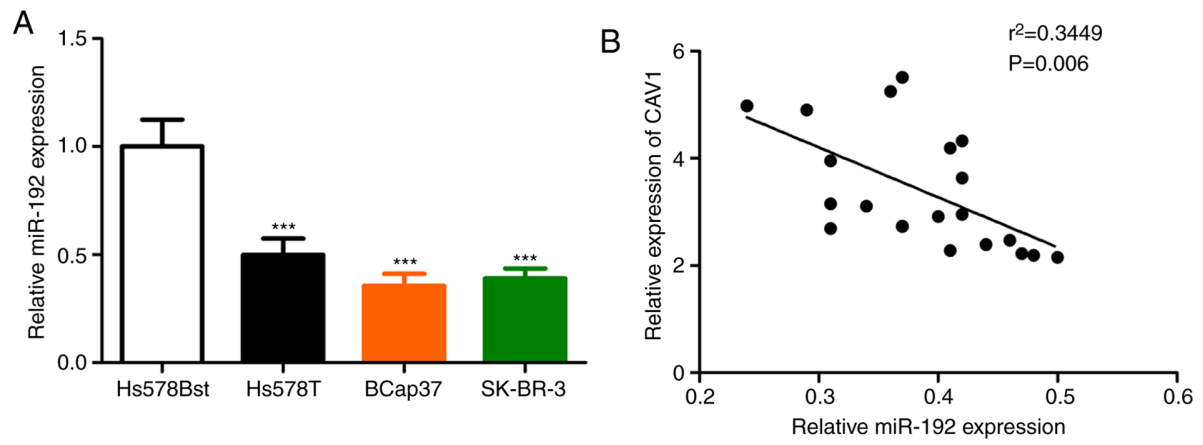

Table SI. Clinical characteristics of breast tissues.

| No. | Age, years | Sex | Organ  | Pathology diagnosis                                | Grade  |
|-----|------------|-----|--------|----------------------------------------------------|--------|
| 1   | 61         | F   | Breast | Non-specific infiltrating ductal carcinoma         | I-II   |
| 2   | 50         | F   | Breast | Non-specific infiltrating ductal carcinoma         | I      |
| 3   | 32         | F   | Breast | Non-specific infiltrating ductal carcinoma         | I-II   |
| 4   | 51         | F   | Breast | Non-specific infiltrating ductal carcinoma         | I      |
| 5   | 61         | F   | Breast | Non-specific infiltrating ductal carcinoma         | II     |
| 6   | 65         | F   | Breast | Non-specific infiltrating ductal carcinoma         | II     |
| 7   | 59         | F   | Breast | Non-specific infiltrating ductal carcinoma         | II     |
| 8   | 55         | F   | Breast | Little non-specific infiltrating ductal carcinoma  | I      |
| 9   | 44         | F   | Breast | Little non-specific infiltrating ductal carcinoma  | I      |
| 10  | 54         | F   | Breast | Non-specific infiltrating ductal carcinoma         | II     |
| 11  | 43         | F   | Breast | Non-specific infiltrating ductal carcinoma         | II     |
| 12  | 78         | F   | Breast | Non-specific infiltrating ductal carcinoma         | II-III |
| 13  | 52         | F   | Breast | Little non-specific infiltrating ductal carcinoma  | II     |
| 14  | 45         | F   | Breast | Non-specific infiltrating ductal carcinoma         | II     |
| 15  | 42         | F   | Breast | Non-specific infiltrating ductal carcinoma         | I-II   |
| 16  | 65         | F   | Breast | Non-specific infiltrating ductal carcinoma         | I-II   |
| 17  | 56         | F   | Breast | Non-specific infiltrating ductal carcinoma         | I-II   |
| 18  | 72         | F   | Breast | Non-specific infiltrating ductal carcinoma         | I      |
| 19  | 51         | F   | Breast | Non-specific infiltrating ductal carcinoma         | I      |
| 20  | 52         | F   | Breast | Non-specific infiltrating ductal carcinoma         | I      |
| 21  | 58         | F   | Breast | Non-specific infiltrating ductal carcinoma         | II     |
| 22  | 69         | F   | Breast | Non-specific infiltrating ductal carcinoma         | II     |
| 23  | 59         | F   | Breast | Little non-specific infiltrating ductal carcinoma  | II     |
| 24  | 53         | F   | Breast | Non-specific infiltrating ductal carcinoma         | I      |
| 25  | 56         | F   | Breast | Non-specific infiltrating ductal carcinoma         | II     |
| 26  | 53         | F   | Breast | Non-specific infiltrating ductal carcinoma         | I      |
| 27  | 76         | F   | Breast | Non-specific infiltrating ductal carcinoma         | I-II   |
| 28  | 68         | F   | Breast | Non-specific infiltrating ductal carcinoma         | I-II   |
| 29  | 64         | F   | Breast | Non-specific infiltrating ductal carcinoma         | II     |
| 30  | 73         | F   | Breast | Little non-specific infiltrating ductal carcinoma  | I      |
| 31  | 28         | F   | Breast | Non-specific infiltrating ductal carcinoma         | I      |
| 32  | 81         | F   | Breast | Non-specific infiltrating ductal carcinoma         | II     |
| 33  | 49         | F   | Breast | Non-specific infiltrating ductal carcinoma         | I      |
| 34  | 57         | F   | Breast | Non-specific infiltrating ductal carcinoma         | I      |
| 35  | 68         | F   | Breast | Non-specific infiltrating ductal carcinoma         | I-II   |
| 36  | 51         | F   | Breast | Little non-specific infiltrating ductal carcinoma  | II     |
| 37  | 53         | F   | Breast | Non-specific infiltrating ductal carcinoma         | II     |
| 38  | 72         | F   | Breast | Non-specific infiltrating ductal carcinoma         | I-II   |
| 39  | 43         | F   | Breast | Non-specific infiltrating ductal carcinoma         | II     |
| 40  | 40         | F   | Breast | Non-specific infiltrating ductal carcinoma         | II     |
| 41  | 53         | F   | Breast | Non-specific infiltrating ductal carcinoma         | II     |
| 42  | 53         | F   | Breast | Little non-specific infiltrating ductal carcinoma  | I      |
| 43  | 63         | F   | Breast | Non-specific infiltrating ductal carcinoma         | I      |
| 44  | 43         | F   | Breast | Non-specific infiltrating ductal carcinoma         | I      |
| 45  | 60         | F   | Breast | Non-specific infiltrating ductal carcinoma         | II     |
| 46  | 86         | F   | Breast | Little non-specific infiltrating ductal carcinoma  | I      |
| 47  | 70         | F   | Breast | Non-specific infiltrating ductal carcinoma         | I      |
| 48  | 66         | F   | Breast | Nonspecific infiltrating ductal carcinoma          | I      |
| 49  | 59         | F   | Breast | Nonspecific infiltrating ductal carcinoma          | I      |
| 50  | 37         | F   | Breast | Nonspecific infiltrating ductal carcinoma          | I      |
| 51  | 33         | F   | Breast | Nonspecific infiltrating ductal carcinoma          | II     |
| 52  | 54         | F   | Breast | Nonspecific infiltrating ductal carcinoma          | I      |
| 53  | 46         | F   | Breast | A little nonspecific infiltrating ductal carcinoma | II     |
| 54  | 48         | F   | Breast | Nonspecific infiltrating ductal carcinoma          | II     |
| 55  | 42         | F   | Breast | Nonspecific infiltrating ductal carcinoma          | II     |
| 56  | 38         | F   | Breast | Nonspecific infiltrating ductal carcinoma          | II     |
| 57  | 66         | F   | Breast | Nonspecific infiltrating ductal carcinoma          | II     |
| 58  | 64         | F   | Breast | Little nonspecific infiltrating ductal carcinoma   | II     |

F, female.
